# Supplementary material
Source: ML conference proceedings conference paper supplement (https://openreview.net/forum?id=qcFbW8bstj)
Supplement: supplementary_material [file attachment]

# SUPPLEMENTARY MATERIALS FOR TRAINING-FREE STYLIZED ABSTRACTION

**Anonymous authors**

Paper under double-blind review

## 1 ADDITIONAL EXPERIMENTAL DETAILS

On average, identity distillation through the VLLM requires four queries, followed by two additional requests to the FLUX model for final image synthesis. The full prompt generation process typically takes about one minute, while FLUX produces the stylized outputs in approximately 1.15 minutes. This runtime is comparable to GPT-5, which averages 2.5 minutes for generating a stylized image.

## 2 MORE BASELINE COMPARISONS

We have compared our method with other recent methods and shown the results in Figure 1

## 3 BASELINES SETUP

**RF-Inversion Rout et al. (2025a).** For RF-Inversion experiments, we use the FluxPipeline with pretrained weights from FLUX.1-dev, applying a fixed set of 10 stylized prompts (e.g., Knitted Doll, Lego, Anime, Pixar, Barbie Doll, etc.). Each input image is first inverted into the latent space using 28 inversion steps with a gamma value of 0.5. Stylized outputs are then generated from the inverted latents using the corresponding prompt, with a diffusion range restricted to the first 25% of the process (start timestep=0.0, stop timestep=0.25) across 50 inference steps. We use eta=0.9 for sampling noise and fix the random seed for deterministic results.

**RB-Modulation Rout et al. (2025b).** We evaluate the RB-Modulation framework, which is built on top of StableCascade, for multi-style portrait generation. The system employs a two-stage cascade: Stage-C integrates style guidance using a reference image via the RBM module, while Stage-B decodes the modulated representation into a high-resolution image. For each input image, we condition generation on a fixed set of ten styles, including *Knitted Doll*, *Lego*, *Anime*, *Pixar*, *South Park*, *Barbie Doll*, among others. Style is injected by computing EffNet embeddings from a style reference image, which are passed to Stage-C. Sampling is performed using a cosine schedule with 20 denoising steps for Stage-C (cfg = 4.0) and 10 steps for Stage-B (cfg = 1.1). The generation prompt follows the format: ``a portrait of a [man/woman] in [style] style''. All images are generated at a resolution of  $1024 \times 1024$  and saved under structured directories organized by style. Model weights are loaded from preconfigured files (stage\_c\_3b.yaml and stage\_b\_3b.yaml), and all experiments are run on a single NVIDIA GPU with bfloat16 precision.

**StyleID Le & Carlsson (2022).** The model performs DDIM inversion of both content and style images to extract intermediate attention features across multiple timesteps and layers. These features are selectively fused by preserving the query components from the content and injecting key/value components from the style via cross-layer modulation. Images are center-cropped and resized to  $512 \times 512$ , then encoded into a latent space using a 50-step DDIM inversion process. Feature fusion occurs from step 49 to 0 using layers 6 through 11 of the U-Net architecture. Inference is performed using a modified DDIM sampler with temperature scaling ( $T = 1.5$ ) and query preservation strength ( $\gamma = 0.75$ ), allowing detailed control over style-content disentanglement.

**InstantID Wang et al. (2024).** We employ the InstantID pipeline, a face-aware stylization system built on top of Stable Diffusion XL with ControlNet and IP-Adapter conditioning. For each image, we detect and extract facial features using the InsightFace ‘antelopev2’ model, which provides both facial landmarks and a 512-dimensional identity embedding. The largest

054  
 055  
 056  
 057  
 058  
 059  
 060  
 061  
 062  
 063  
 064  
 065  
 066  
 067  
 068  
 069  
 070  
 071  
 072  
 073  
 074  
 075  
 076  
 077  
 078  
 079  
 080  
 081  
 082  
 083  
 084  
 085  
 086  
 087  
 088  
 089  
 090  
 091  
 092  
 093  
 094  
 095  
 096  
 097  
 098  
 099  
 100  
 101  
 102  
 103  
 104  
 105  
 106  
 107

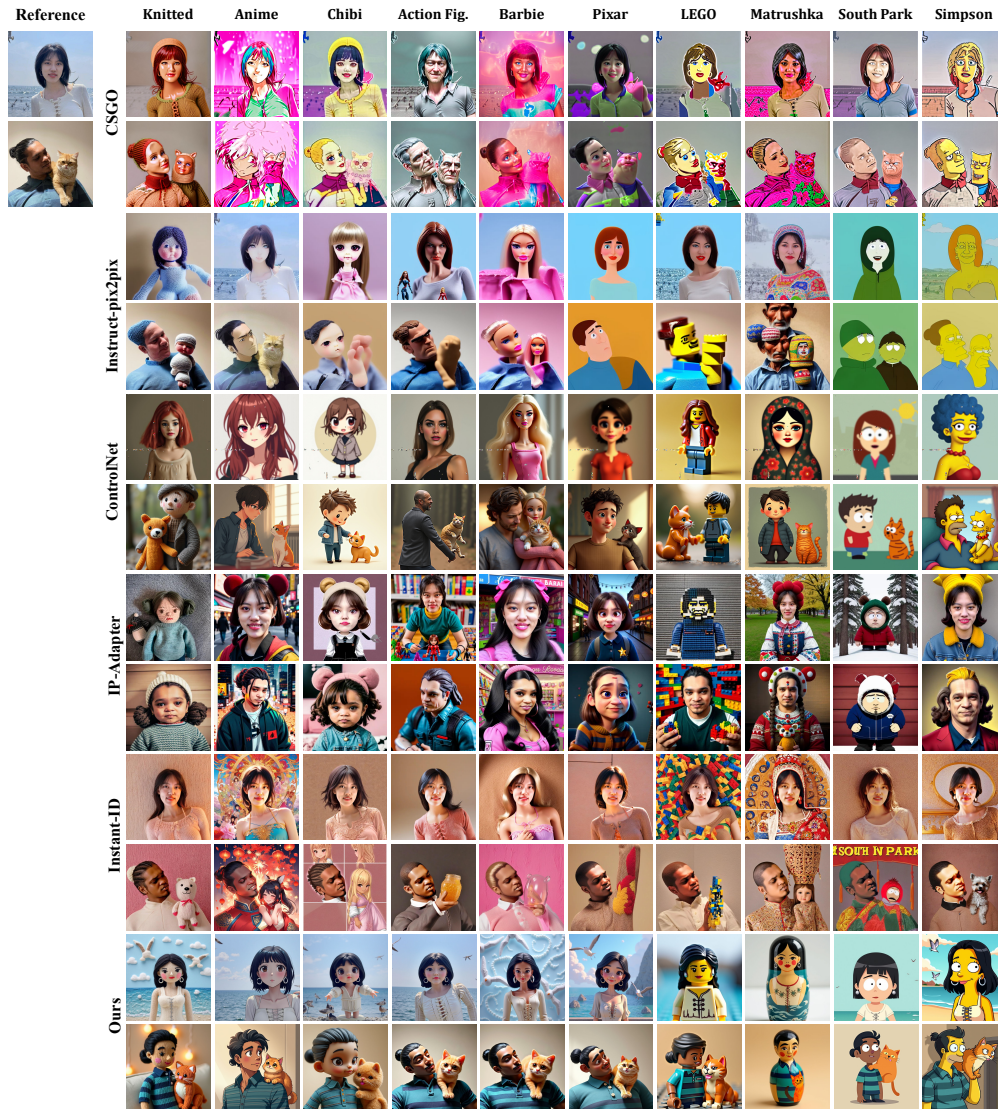

Figure 1: Qualitative comparison with other state-of-the-art methods.

detected face is used for identity preservation. The model is composed of a base SDXL backbone (stabilityai/stable-diffusion-xl-base-1.0), augmented with ControlNet and an IP-Adapter module. Facial keypoints are rendered as a control image, while the identity embedding is injected via the IP-Adapter. The prompt used follows the format: ``a portrait of [man/woman] in [style] style'', with gender determined based on pre-mapped image indices. Images are resized to a maximum of  $1280 \times 1280$  with alignment to multiples of 64 for efficiency. We apply 30 inference steps with a guidance scale of 5.0, and both the ControlNet and IP-Adapter conditioning scales are set to 0.8. For each image and style (e.g., *Knitted Doll*, *Lego*, *Pixar*, etc.). All experiments are performed on a CUDA-enabled GPU with float32 precision.

**DreamBooth Ruiz et al. (2023).** We fine-tune a Stable Diffusion model using the DreamBooth method for subject-driven generation. The model is trained with a unique identifier token associated with a specific subject. During inference, we use the fine-tuned model to generate stylized outputs conditioned on prompts such as ``a photo of sks person in south park style''.

108 We utilize the `StableDiffusionPipeline` from the `diffusers` library with half-precision  
109 (float16) enabled for memory efficiency. Classifier-free guidance is set to 7.5, and inference is  
110 performed with 50 sampling steps. Each prompt is repeated four times to generate a batch of diverse  
111 samples. All experiments are conducted on an NVIDIA GPU with CUDA acceleration.

112 **CSGO Xing et al. (2024).** The model is built on top of Stable Diffusion XL and integrates IP-Adapter  
113 modules for content and style injection, in conjunction with ControlNet for structural guidance. We  
114 use a curated set of exemplar images representing ten artistic styles (*Knitted Doll, Lego, Anime, Pixar,*  
115 *Barbie Doll*, etc.). For each input image, we determine a prompt of the form ``a portrait of  
116 [man/woman] in [style]`` based on predefined subject-gender mappings. For multi-subject  
117 images, we use a generalized prompt: ``convert into [style] style``. The pipeline  
118 uses pretrained SDXL weights, a customized VAE, and a ControlNet variant trained on tiling patterns.  
119 Identity conditioning is injected via content and style tokens (4 and 32 tokens respectively), targeting  
120 both base UNet and ControlNet blocks. The content image is resized to align with the model’s base  
121 resolution and passed through a shared resampler. Stylization is conditioned on a ControlNet scale of  
122 0.6, with guidance and style scales set to 10.0 and 1.0, respectively. Generation is performed over 50  
123 denoising steps, and the seed is fixed to 42 for deterministic outputs.

124 **DiffArtist Jiang & Chen (2024).** DiffArtist is built on Stable Diffusion and SDXL. We use  
125 50 DDIM inversion and generation steps with a classifier-free guidance scale of 3.5. Attention  
126 injection is configured with `share_key=True`, `share_query=True`, `share_value=False`,  
127 `share_resnet_layers=[0, 1]`, `share_attn=False`, and `share_cross_attn=False`.  
128 AdaIN is enabled (`use_adain=True`), and content anchoring is applied during disentangled  
129 generation (`use_content_anchor=True`). SDXL runs in `float16` precision, while the VAE  
130 operates in `float32`.

131 **IP-Adapter Ye et al. (2023).** For IP-Adapter Ye et al. (2023) experiments, we adopt the Stable  
132 Diffusion v1.5 base model and integrate the lightweight IP-Adapter module with 22M parameters.  
133 Each input image prompt is encoded using a frozen OpenCLIP ViT-H/14 image encoder, followed by  
134 a projection into 4 learnable tokens. These image features are injected via decoupled cross-attention  
135 layers added to all 16 UNet cross-attention blocks. During inference, we set the image prompt weight  
136 to  $\lambda = 1.0$  and use an empty text prompt for pure image-prompt conditioning. Sampling is performed  
137 using DDIM with 50 steps and a guidance scale of 7.5. All image generations are deterministic with  
138 fixed seeds, ensuring reproducibility. The model supports multimodal prompts and is compatible  
139 with ControlNet and other controllable adapters without additional fine-tuning.

#### 4 PROMPT FOR IDENTITY DISTILLATION

##### Facial Attributes.

I will provide you with an image of a human face. Produce a comprehensive, forensic style facial description in a single dense paragraph, detailed enough for accurate human reconstruction or forensic sketching. Describe the individual's apparent biological sex, race or ethnic background, estimated age range, and general physique or body weight appearance (e.g., underweight, average, heavysset, muscular). Detail the skin tone with precision note undertones (cool, warm, neutral), pigmentation, and visible texture such as freckles, moles, scars, or blemishes. For the face shape, specify whether it is oval, round, square, heartshaped, or diamond, and describe the jawline in terms of sharpness, width, and angularity. Include the forehead's height and width, the hairline contour, and whether it is straight, receding, or widow's peak. The cheekbones should be described with respect to height, prominence, and lateral placement. Indicate the chin's form pointed, cleft, square, rounded, recessed, or protruding. For the nose, describe the overall size, bridge contour (e.g., high, flat, concave, convex), nostril flare, tip shape, and symmetry. Then describe the eyes in terms of shape (almond, round, hooded, monolid), tilt (upturned, downturned, straight), size, spacing, iris color, scleral clarity, and the presence or absence of an eyelid crease. Note eyelash length and curl if prominent. Detail the eyebrows' shape (arched, flat, curved), thickness, length, color, grooming style, and position relative to the eye socket. For the mouth, describe lip shape (e.g., heartshaped, bowshaped), fullness, vertical distance to nose and chin, symmetry, the sharpness or softness of the cupid's bow, and overall coloring or pigmentation. Describe the teeth if visible alignment, spacing, color. Include a description of the ears, noting size, angle of protrusion, lobe attachment, and visibility from the front. Describe hair color, texture (straight, wavy, curly, coiled), length, parting, volume, and any dyeing or graying. Finally, include the inter feature ratios, such as the distance from eyes to nose, nose to mouth, mouth to chin, and face width to height, noting vertical and horizontal harmony or asymmetry. Use anatomically precise, observational language as would be found in professional forensic profiling.

##### Clothes and Accessories.

I will provide you with an image of a human subject. Generate a highly detailed, forensic style description of the subject's clothing, accessories, and appearance related adornments in a single continuous paragraph. The description should allow an observer to accurately reconstruct the subject's outfit, materials, and stylistic presentation. Begin with the overall outfit type, including the layering of garments and whether the attire suggests a formal, casual, professional, athletic, cultural, or weather specific context. Describe each clothing item from top to bottom identify the garment type (e.g., jacket, blouse, hoodie, dress), cut and silhouette (e.g., fitted, oversized, cropped, tailored), and the fabric type (cotton, denim, silk, wool, synthetic blend) including texture (smooth, ribbed, coarse, sheer, glossy, matte). Include color, noting primary tones, secondary hues, patterns (e.g., floral, plaid, geometric, logo prints), and fading or distressing. Specify visible closures such as buttons, zippers, drawstrings, or snaps, and describe collars, sleeves, cuffs, hems, stitching, and trim in detail. Mention the fit and drape on the body, whether loose, structured, or body hugging. Describe pants, skirts, or lower garments similarly, including waistband type, length, cut (e.g., tapered, flared, pleated), and material behavior (e.g., stiff, flowy, elastic). Provide precise detail on footwear, covering type (e.g., sneakers, boots, sandals), color, condition (new, worn, scuffed), sole thickness, fasteners, and branding if visible. For accessories, describe all items such as belts, hats, scarves, bags, jewelry, watches, or sunglasses, including their material (leather, metal, plastic), placement, size, color, and design. For jewelry, note shape, stone types, metal color, and position (e.g., left wrist, right earlobe). Mention any logos, emblems, name tags, or inscriptions, their location, style, and legibility. Include hair style related adornments like hair clips, ties, bands, or veils if present. Indicate whether the clothing is clean, wrinkled, tailored, or weathered, and how it interacts with the subject's posture or movement. Use clear, descriptive language with observational precision, suitable for law enforcement or forensic documentation.

216  
217  
218  
219  
220  
221  
222  
223  
224  
225  
226  
227  
228  
229  
230  
231  
232  
233  
234  
235  
236  
237  
238  
239  
240  
241  
242  
243  
244  
245  
246  
247  
248  
249  
250  
251  
252  
253  
254  
255  
256  
257  
258  
259  
260  
261  
262  
263  
264  
265  
266  
267  
268  
269

**Posture.**

I will provide you with an image of a human subject. Generate an anatomically precise, forensic style description of the subject's pose, body orientation, and posture in a single dense paragraph, suitable for reconstruction in forensic modeling, animation, or figure drawing. Begin by describing the overall stance whether the subject is standing, sitting, leaning, crouching, walking, or in motion and specify the distribution of body weight (e.g., evenly balanced, shifted to one hip, resting on one leg, slouched). Indicate the torso orientation, such as facing forward, three quarter turn, side profile, or twisted at the waist. Describe the spine posture in terms of straightness, curvature, or slouch. Detail shoulder position (level, raised, dropped, angled) and arm placement, specifying whether arms are relaxed, crossed, bent, akimbo, behind the back, or holding an object. Note the hand position, including whether fingers are spread, curled, pointing, or interacting with any surface, accessory, or garment. Include the leg position and angle whether straight, crossed, bent, staggered, or one knee slightly raised and describe foot placement relative to the body and ground, noting if feet are parallel, angled outward/inward, or midstride. Specify the head tilt, pitch, yaw, and roll (e.g., upright, nodding forward, tilted to the side, turned partially), and describe eye gaze direction (e.g., looking straight ahead, offcamera, downward, or toward an object or person). Indicate whether the pose appears relaxed, tense, alert, casual, formal, or dynamic, and if the subject is interacting with the environment (e.g., leaning against a wall, sitting on a chair, walking up stairs). Include relational geometry such as angles between limbs, distance between hands and torso, and chin to shoulder alignment to allow for 3D pose reconstruction. Use clear anatomical and kinesiological language appropriate for forensic modeling or biomechanical analysis.

**Background.**

I will provide you with an image containing a human subject within a visible environment. Generate a comprehensive, continuous paragraph that describes the background and setting in exhaustive detail, suitable for recreating the scene in forensic reconstruction, virtual staging, or cinematic layout. Begin with the type of environment whether it is indoor or outdoor, public or private, residential, commercial, natural, or constructed. Describe the primary spatial context such as a street, room, park, studio, hallway, or landscape, and specify depth cues like perspective, vanishing points, and visible horizon lines. Detail the lighting conditions, indicating whether the light is natural or artificial, the light source direction (e.g., overhead, frontal, backlit), shadow presence and length, and overall ambience (e.g., bright, dim, moody, clinical). Provide the color palette of the background dominant hues, gradients, saturation, and color temperature (warm, cool, neutral). Describe surface textures and materials walls, floors, or ground surfaces (e.g., tiled, carpeted, wooden, concrete, grassy), their cleanliness, reflectiveness, or damage. Include any visible structures or objects, such as furniture, windows, fences, signage, artwork, cables, curtains, vehicles, trees, or architectural details, describing their placement, size, condition, and interaction with light or shadows. Mention background activity if any other people, movement, animals, or vehicles and whether the environment is static or dynamic. Indicate the depth of field how blurred or sharp background elements appear relative to the subject. Include information about weather or atmospheric effects (e.g., fog, rain, sunlight, haze, reflections), time of day, and seasonal indicators (e.g., dry leaves, snow, blossoming plants). Describe any visible text, logos, posters, or signage in the background, noting legibility, language, and style. Conclude with the spatial relationship between the subject and background how far the subject appears from walls, objects, or vanishing points and whether there are any visual elements framing or isolating the subject. Use precise, observational language suitable for forensic, cinematic, or architectural analysis.

270  
271  
272  
273  
274  
275  
276  
277  
278  
279  
280  
281  
282  
283  
284  
285  
286  
287  
288  
289  
290  
291  
292  
293  
294  
295  
296  
297  
298  
299  
300  
301  
302  
303  
304  
305  
306  
307  
308  
309  
310  
311  
312  
313  
314  
315  
316  
317  
318  
319  
320  
321  
322  
323

### Combine.

I will provide a detailed description of an image. Your task is to compress and distill the description into two versions:

**T5 Embedding Prompt (512 tokens max):** Use all 512 tokens. Preserve the most salient, semantically rich, and distinctive features of the image that would help T5 encode identity, context, style, and layout. Discard irrelevant or negative information (e.g., "no visible tattoos") if necessary for brevity.

**CLIP Embedding Prompt (77 tokens max):** Create a compressed caption and use all 77 tokens, optimized for CLIP’s contrastive text-image embedding. Prioritize visual discriminability and identity-relevant details, especially those that can anchor visual features (e.g., colors, shapes, facial attributes, clothing style, environment cues).

In both cases, your goal is to retain the most distinguishing and generative elements from the input description, suitable for retrieval or conditional generation tasks.

## 5 STYLEBENCH EVALUATION PROMPT

### Prompt.

**Task Definition** You will be provided with three inputs: a reference image, a stylized generated image, and a style prompt. Your task is to evaluate how well the generated image captures the intended style abstraction while preserving the recognizable identity of the subject in the reference image.

**Evaluation Focus** This is a task of stylized abstraction, not realism or direct replication. The goal is not to retain exact facial proportions or textures from the reference but to abstract the subject into a distinct artistic or toy-like style. The reference image provides the identity cues, such as hairstyle, accessories, clothing, skin tone, or posture, which should be recognizable in the generated image despite heavy stylistic transformation. The style prompt dictates the visual language that the generation should adhere to, such as the yarn texture of a knitted doll, the plastic blockiness of a LEGO figure, or the yellow skin and cartoon geometry of a Simpson character. A good abstraction interprets the identity through the lens of the target style. For instance, in a LEGO doll style, the facial features may become minimal and geometric, but an iconic element like Einstein’s wild hair or Michael Jackson’s fedora must still be present. In a South Park style, the flat shading and round cut-out forms are expected, while the individual identity is retained through clothing or hair color. Likewise, in Ghibli or Van Gogh styles, the abstraction involves painterly texture and expressive strokes rather than exact geometry. The fidelity of abstraction lies in this balance between stylization and recognizability.

**Scoring Criteria** You must assess the generated image based on three integrated dimensions:

- How well the image adheres to the specified style in the prompt.
- Whether key identifying features from the reference image are preserved.
- Whether the abstraction effectively fuses identity and style into a coherent result.

Note that expressions, pose, and compositional cues should come from the reference image. The quality of the abstraction depends on both a strong stylistic transformation and the faithful reinterpretation of subject identity.

324  
325  
326  
327  
328  
329  
330  
331  
332  
333  
334  
335  
336  
337  
338  
339  
340  
341  
342  
343  
344  
345  
346  
347  
348  
349  
350  
351  
352  
353  
354  
355  
356  
357  
358  
359  
360  
361  
362  
363  
364  
365  
366  
367  
368  
369  
370  
371  
372  
373  
374  
375  
376  
377

**Prompt.**

**Scoring Range** Assign a score from 0 to 4: Very Poor (0): The generated image fails to apply the intended style and does not retain recognizable identity. Poor (1): The style is weak or incorrect; most identity traits are lost. Fair (2): The style is moderately applied, with partial identity preservation. Good (3): The image reflects the correct style and retains most identity features. Excellent (4): The image is a faithful and expressive stylization that captures both the identity and style seamlessly.

**Input Format** You will receive:

A reference image

A stylized generated image

A style prompt

**Output Format**

**Score: [Your Score]**

Only return the score. Do not include any justification or explanation.

## REFERENCES

- Ruixiang Jiang and Changwen Chen. Diffartist: Towards structure and appearance controllable image stylization, 2024.
- Minh-Ha Le and Niklas Carlsson. Styleid: Identity disentanglement for anonymizing faces. *arXiv preprint arXiv:2212.13791*, 2022.
- L Rout, Y Chen, N Ruiz, C Caramanis, S Shakkottai, and W Chu. Semantic image inversion and editing using rectified stochastic differential equations. In *The Thirteenth International Conference on Learning Representations*, 2025a. URL <https://openreview.net/forum?id=Hu0FSOSEyS>.
- L Rout, Y Chen, N Ruiz, A Kumar, C Caramanis, S Shakkottai, and W Chu. Rb-modulation: Training-free stylization using reference-based modulation. In *The Thirteenth International Conference on Learning Representations*, 2025b. URL <https://openreview.net/forum?id=bnINPG5A32>.
- Nataniel Ruiz, Yuanzhen Li, Varun Jampani, Yael Pritch, Michael Rubinstein, and Kfir Aberman. Dreambooth: Fine tuning text-to-image diffusion models for subject-driven generation. In *Proceedings of the IEEE/CVF conference on computer vision and pattern recognition*, pp. 22500–22510, 2023.
- Qixun Wang, Xu Bai, Haofan Wang, Zekui Qin, Anthony Chen, Huaxia Li, Xu Tang, and Yao Hu. Instantid: Zero-shot identity-preserving generation in seconds. *arXiv preprint arXiv:2401.07519*, 2024.
- Peng Xing, Haofan Wang, Yanpeng Sun, Qixun Wang, Xu Bai, Hao Ai, Renyuan Huang, and Zechao Li. Csgo: Content-style composition in text-to-image generation. *arXiv preprint arXiv:2408.16766*, 2024.
- Hu Ye, Jun Zhang, Sibio Liu, Xiao Han, and Wei Yang. Ip-adapter: Text compatible image prompt adapter for text-to-image diffusion models. *arXiv preprint arXiv:2308.06721*, 2023.
